# Supplementary material for: Aminolysis of the Si–Cl bond and ligand exchange reaction between silicon amido derivatives and SiCl4: synthetic applications and kinetic investigationsElectronic supplementary information (ESI) available: details of the aminolysis and the ligand exchange reaction. See http://www.rsc.org/suppdata/dt/b2/b210282j/
Source: Royal Society of Chemistry journal article supplement (doi:10.1039/b210282j), 2003-01-08
Supplement: b210282j.doc [file b210282j.doc]

### Aminolysis

The aminolisys reaction is the following (Equation A1).

##### Equation A1

Provided that the experimental data indicate that the reaction is irreversible, the kinetic law should be dependent on concentrations of the silicon compound and/or of the amine according to the following differential equation (Equation A2), the integrated equations being given in Table A1.

##### Equation A2

**Table A1**. Integrated equations for the aminolysis reaction.

| *m* | *n* | Equation | *A* | *B* |
| --- | --- | --- | --- | --- |
| 1 | 0 | -ln(1-x)=kt | - | - |
| 0 | 1 | -ln(1-Rx)=kt | - | - |
| 1 | 1 | *A*ln[(1-Rx)/(1-x)]=kc1t | 1/(1-R) | - |
| 1 | 2 | *A*ln(1-Rx)/(1-x)+*B*x/(1-x)= =kc12t | 1/(1-R)2 | -R/(1-R) |
| 2 | 1 | *A*ln(1-Rx)/(1-x)-*B*x/(1-x)= =kc0c1t | -R/(1-R)2 | 1/(1-R) |

The value of f(x) (*i.e.* left-side expression in the equation reported in Table 1) calculated for the reactions SiCl4 + NHiPr2, SiCl2(NEt2)2 + NH2iPr and SiCl(NMe2)3 + NH2iPr have been plotted *vs.* time for different values of *n* and *m* (the plots are omitted for brevity). Noteworthy, only for *m* = 1 and *n* = 0, the plot of f(x) *vs.* time is a straight line (Figure A1), thus indicating that the rate law is first-order with respect to the silicon compound and does not depend on the concentration of the amine. Moreover, the substantial coincidence of f(x) obtained with different starting silicon compound/amine molar ratios clearly indicates the zero-order of the reaction rate with respect to the concentration of the amine.

**
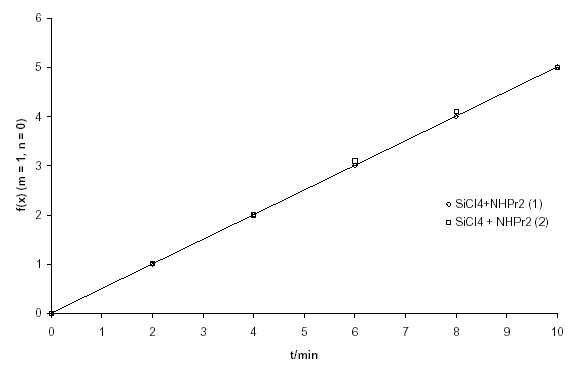
**

**
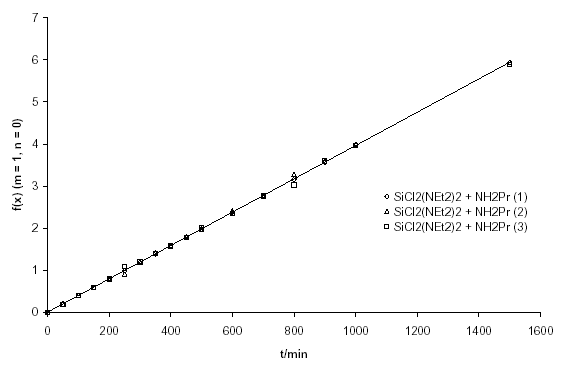
**

**
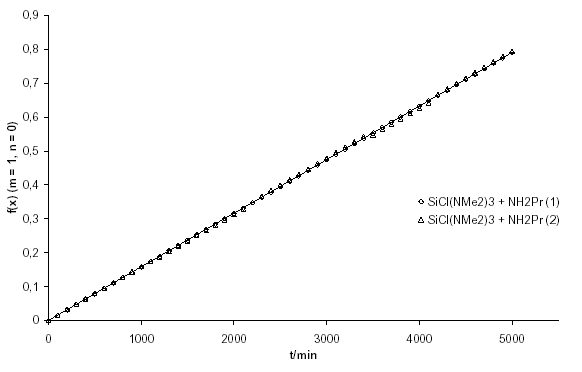
**

**Figure A1**. Plot of f(x) vs. time (*cf*. Table A1 and Table 4 of the paper) for *m* = 1, *n* = 0.

### Ligand exchange reaction

The ligand exchange reaction between SiCl4 and SiCl2(NEt2)2 is given in Equation A3.

##### Equation A3

Provided that the experimental data indicates that the reaction is reversible, Equation A4 is the general rate law.

##### Equation A4

In order to determine *f*, *g* and *h*, the incremental ratio x/t was calculated from the experimental data and the fit of x/t *vs.* x was performed using different value of *f*, *g* and *h*, satisfactory accordance being obtained for *f* = *h* = 1 and *g* = 0. Then, the appropriate differential equation was integrated and the kinetic constants calculated by fitting x *vs.* time.

The same procedure was followed in the case of SiCl(NMe2)3 + SiCl4, yielding the rate laws reported in Scheme 7 of the paper).

The equilibrium constants for the ligand exchange reaction between SiCl4 and SiCl2(NEt2)2 has been calculated according to the following equation (Equation A5).

##### Equation A5

The error of Keq have been determined by standard error propagation.

A similar procedure has been followed for the SiCl(NMe2)3/SiCl4 system.
